# Supplementary material
Source: ML conference proceedings conference paper supplement (https://aclanthology.org/2022.findings-acl.96)
Supplement: software [file crowdsourced_FIGER_layer1_cooccurrence_nums_by_mention.xlsx]

## Sheet: crowdsourced_FIGER_layer1_coocc
government_agency ; organization	192
product ; organization	113
organization ; government_agency	111
organization ; product	106
location ; geography	103
organization ; internet	95
person ; people	83
organization ; person	73
organization ; government	66
biology ; person	63
organization ; news_agency	60
organization ; finance	60
location ; building	57
person ; organization	51
location ; park	49
person ; title	46
government ; organization	43
building ; organization	40
internet ; organization	39
newspaper ; news_agency	37
organization ; building	36
person ; biology	34
organization ; people	34
location ; organization	31
building ; location	30
geography ; location	29
park ; location	28
product ; internet	27
news_agency ; organization	25
news_agency ; internet	25
event ; government_agency	24
newspaper ; organization	23
organization ; None	22
internet ; product	22
government_agency ; person	21
organization ; event	21
organization ; military	20
software ; product	19
internet ; news_agency	18
government_agency ; event	17
location ; person	16
government_agency ; government	16
government ; government_agency	16
organization ; location	15
art ; written_work	15
organization ; education	15
product ; None	14
building ; park	13
location ; transportation	13
software ; organization	13
military ; organization	13
None ; organization	13
product ; finance	12
event ; organization	12
people ; location	11
government_agency ; building	11
person ; military	11
person ; None	11
title ; person	10
building ; government_agency	10
written_work ; news_agency	10
software ; internet	10
newspaper ; internet	10
None ; product	10
person ; location	9
people ; person	9
finance ; organization	9
government ; location	9
product ; software	9
broadcast_program ; written_work	8
organization ; software	8
park ; geography	8
park ; building	8
written_work ; law	8
broadcast_network ; broadcast	7
None ; finance	7
building ; rail	7
finance ; government_agency	7
people ; organization	6
people ; None	6
written_work ; None	6
law ; written_work	6
broadcast ; news_agency	6
computer ; product	6
written_work ; internet	6
geography ; park	6
location ; rail	6
transit ; rail	6
military ; government_agency	5
location ; event	5
news_agency ; product	5
news_agency ; broadcast	5
None ; written_work	5
military ; person	5
person ; event	5
location ; transit	5
building ; transit	5
government ; person	5
product ; building	5
software ; computer	5
astral_body ; product	5
written_work ; organization	5
news_agency ; government_agency	4
news_agency ; written_work	4
person ; government	4
law ; None	4
government_agency ; finance	4
organization ; broadcast	4
product ; broadcast	4
news_agency ; broadcast_network	4
organization ; food	4
None ; software	4
building ; None	4
broadcast ; organization	4
None ; people	4
organization ; newspaper	4
product ; news_agency	4
news_agency ; newspaper	4
transportation ; park	3
government ; people	3
government ; None	3
military ; building	3
location ; people	3
None ; person	3
government_agency ; news_agency	3
newspaper ; written_work	3
None ; law	3
location ; government_agency	3
game ; organization	3
event ; written_work	3
computer ; software	3
god ; person	3
person ; news_agency	3
park ; event	3
government_agency ; people	3
internet ; software	3
government_agency ; location	3
organization ; broadcast_network	3
event ; government	3
written_work ; product	3
government_agency ; military	3
music ; written_work	3
product ; game	3
transportation ; location	2
None ; government_agency	2
product ; food	2
food ; organization	2
location ; None	2
government ; military	2
internet ; building	2
finance ; None	2
organization ; geography	2
location ; government	2
organization ; broadcast_program	2
product ; location	2
event ; building	2
broadcast_network ; news_agency	2
broadcast_network ; organization	2
event ; people	2
event ; location	2
product ; chemistry	2
transit ; location	2
broadcast_program ; art	2
people ; government_agency	2
organization ; computer	2
internet ; newspaper	2
organization ; game	2
organization ; written_work	2
government_agency ; None	2
finance ; software	2
transportation ; building	2
None ; location	2
geography ; person	2
building ; military	2
product ; broadcast_program	2
broadcast ; internet	2
broadcast ; broadcast_program	2
internet ; broadcast_program	2
transit ; building	2
person ; government_agency	2
finance ; building	1
transportation ; product	1
person ; written_work	1
finance ; event	1
building ; product	1
disease ; person	1
food ; product	1
park ; transportation	1
government ; finance	1
internet ; broadcast	1
event ; None	1
play ; None	1
government_agency ; broadcast_program	1
building ; geography	1
military ; software	1
broadcast_program ; None	1
park ; organization	1
art ; broadcast_program	1
art ; person	1
broadcast_program ; person	1
written_work ; building	1
written_work ; newspaper	1
broadcast_program ; government_agency	1
broadcast_program ; organization	1
art ; event	1
broadcast ; government_agency	1
event ; art	1
people ; military	1
military ; None	1
newspaper ; person	1
None ; event	1
government_agency ; product	1
chemistry ; organization	1
geography ; organization	1
rail ; transit	1
rail ; location	1
news_agency ; broadcast_program	1
broadcast_program ; internet	1
None ; internet	1
biology ; people	1
person ; education	1
education ; None	1
finance ; internet	1
law ; product	1
education ; organization	1
building ; written_work	1
park ; written_work	1
location ; written_work	1
game ; event	1
computer ; organization	1
building ; event	1
software ; biology	1
software ; livingthing	1
computer ; biology	1
computer ; livingthing	1
biology ; livingthing	1
medicine ; chemistry	1
event ; finance	1
written_work ; event	1
location ; product	1
location ; chemistry	1
product ; transportation	1
transportation ; chemistry	1
building ; chemistry	1
None ; building	1
finance ; livingthing	1
government ; event	1
product ; event	1
event ; news_agency	1
event ; internet	1
geography ; people	1
finance ; product	1
person ; god	1
train ; organization	1
train ; product	1
broadcast ; broadcast_network	1
military ; event	1
education ; event	1
education ; written_work	1
education ; military	1
None ; computer	1
people ; biology	1
product ; broadcast_network	1
news_agency ; building	1
broadcast_network ; building	1
broadcast ; building	1
person ; building	1
music ; art	1
play ; art	1
play ; written_work	1
livingthing ; biology	1
livingthing ; person	1
god ; religion	1
religion ; person	1
software ; building	1
building ; internet	1
food ; building	1
None ; broadcast_program	1
geography ; building	1
internet ; written_work	1
internet ; None	1
None ; news_agency	1
astral_body ; building	1
software ; None	1
written_work ; education	1
art ; park	1
art ; building	1
