# Supplementary material
Source: ML conference proceedings conference paper supplement (https://aclanthology.org/2022.findings-acl.96)
Supplement: software [file crowdsourced_FIGER_layer1_labelset_nums_by_mention.xlsx]

## Sheet: crowdsourced_FIGER_layer1_label
government_agency ; organization	152
location ; geography	89
organization ; product	80
product ; organization	73
biology ; person	62
organization ; government_agency	61
person ; people	53
organization ; internet	51
organization ; government	47
organization ; person	47
person ; title	46
organization ; finance	46
person ; biology	33
government ; organization	32
location ; building	32
person ; organization	31
location ; park	31
geography ; location	26
organization ; news_agency	21
organization ; building	19
event ; government_agency	17
building ; organization	17
building ; location	16
park ; location	15
location ; organization	14
organization ; education	14
location ; person	13
organization ; person ; people	13
organization ; military	13
internet ; organization	12
organization ; government_agency ; government	11
newspaper ; news_agency	11
organization ; people	11
title ; person	10
people ; location	10
newspaper ; organization ; news_agency	10
location ; transportation	9
product ; organization ; internet	9
art ; written_work	9
organization ; event	9
government_agency ; person	9
person ; military	8
news_agency ; organization	7
organization ; location	7
software ; product	7
people ; person	7
government_agency ; event	7
organization ; None	7
organization ; news_agency ; internet	7
organization ; finance ; government_agency	7
government_agency ; person ; organization	6
government_agency ; building ; organization	6
broadcast_program ; written_work	5
location ; park ; geography	5
location ; building ; organization	5
product ; None	5
military ; organization	5
internet ; organization ; product	5
government ; government_agency ; organization	5
astral_body ; product	5
internet ; product ; organization	4
government_agency ; event ; organization	4
person ; location	4
written_work ; news_agency	4
written_work ; law	4
government ; government_agency	4
organization ; internet ; product	4
product ; finance ; organization	4
location ; building ; transit ; rail	4
building ; park	4
location ; geography ; park	4
law ; written_work	4
product ; finance	3
government_agency ; organization ; person	3
building ; park ; location	3
person ; government	3
location ; building ; park	3
software ; organization ; product	3
written_work ; law ; None	3
location ; organization ; building	3
product ; internet ; organization	3
event ; organization	3
organization ; food	3
game ; organization	3
organization ; building ; government_agency	3
organization ; product ; internet	3
organization ; event ; government_agency	3
building ; organization ; government_agency	3
person ; None	3
organization ; government_agency ; event	3
product ; software	3
news_agency ; organization ; internet	3
newspaper ; organization ; news_agency ; internet	3
internet ; organization ; news_agency	3
news_agency ; written_work	2
organization ; software	2
None ; government_agency	2
park ; location ; geography	2
park ; building ; location	2
organization ; geography ; location	2
internet ; news_agency ; product	2
None ; person	2
newspaper ; organization	2
newspaper ; written_work ; news_agency	2
news_agency ; broadcast_network ; broadcast	2
None ; law ; written_work	2
software ; internet ; organization	2
broadcast ; news_agency	2
event ; organization ; government_agency	2
computer ; product ; software	2
internet ; news_agency	2
god ; person	2
organization ; government_agency ; person	2
people ; organization	2
person ; event	2
None ; finance	2
product ; internet	2
organization ; government ; government_agency	2
park ; event ; location	2
broadcast_program ; art ; written_work	2
person ; organization ; people	2
organization ; government_agency ; building	2
government ; person ; location	2
software ; product ; internet	2
None ; organization	2
internet ; newspaper ; news_agency	2
person ; None ; people	2
news_agency ; internet ; organization	2
product ; organization ; None	2
None ; organization ; product	2
news_agency ; government_agency	2
software ; internet	2
military ; person	2
product ; None ; finance	2
news_agency ; internet	2
building ; organization ; location	2
building ; location ; park	2
news_agency ; newspaper ; organization	2
organization ; event ; government ; government_agency	2
organization ; None ; product	2
product ; broadcast ; internet ; broadcast_program	2
software ; computer ; product	2
government_agency ; organization ; government	2
park ; building	2
product ; game	2
organization ; government_agency ; location	2
music ; written_work	2
government ; location	2
transportation ; park ; location	1
government ; people ; organization ; None	1
news_agency ; government_agency ; organization	1
building ; government_agency ; organization	1
organization ; finance ; building	1
product ; food ; organization	1
military ; government_agency ; building	1
transportation ; product	1
person ; written_work	1
location ; None	1
government ; military	1
organization ; finance ; event	1
person ; government ; people	1
internet ; organization ; building ; product	1
disease ; person	1
location ; event	1
location ; people	1
finance ; None	1
food ; product ; organization	1
park ; location ; transportation	1
government_agency ; news_agency	1
government ; government_agency ; finance ; organization	1
internet ; news_agency ; organization ; product	1
internet ; news_agency ; organization ; product ; broadcast	1
event ; None	1
play ; None	1
location ; government	1
government_agency ; organization ; broadcast_program	1
location ; building ; geography	1
government ; military ; organization	1
internet ; news_agency ; organization	1
government ; location ; government_agency	1
product ; location	1
location ; transportation ; park	1
military ; software ; organization	1
event ; building	1
broadcast_program ; None ; written_work	1
park ; building ; organization	1
internet ; building	1
computer ; product	1
art ; broadcast_program ; person	1
park ; location ; building	1
government_agency ; news_agency ; organization	1
product ; None ; software	1
written_work ; building ; None	1
broadcast_network ; broadcast ; news_agency ; organization	1
written_work ; newspaper ; internet ; news_agency	1
broadcast_program ; government_agency ; organization	1
news_agency ; product ; organization ; internet	1
art ; event ; written_work	1
geography ; park	1
military ; organization ; person	1
product ; software ; internet	1
person ; organization ; event ; people	1
broadcast ; organization ; government_agency ; news_agency	1
None ; product ; finance	1
event ; art ; written_work	1
software ; product ; organization	1
organization ; None ; person ; people	1
organization ; person ; None ; people	1
person ; people ; organization ; military ; None	1
person ; organization ; location	1
organization ; newspaper ; news_agency	1
newspaper ; person ; news_agency ; organization	1
person ; people ; organization ; None	1
None ; event	1
government_agency ; product	1
location ; park ; event	1
product ; organization ; news_agency ; internet	1
government_agency ; event ; people	1
None ; finance ; organization	1
product ; chemistry ; organization	1
geography ; location ; organization	1
building ; rail ; transit ; location	1
news_agency ; broadcast_program ; internet	1
broadcast ; organization ; news_agency	1
organization ; people ; government_agency	1
person ; military ; organization	1
organization ; computer	1
organization ; internet ; software	1
organization ; None ; internet	1
government_agency ; location	1
organization ; people ; None	1
person ; people ; location	1
biology ; person ; people	1
organization ; game	1
building ; None	1
product ; building	1
person ; education ; None	1
organization ; finance ; internet	1
law ; None ; product	1
education ; organization	1
newspaper ; organization ; written_work ; news_agency	1
software ; product ; organization ; internet	1
building ; park ; location ; written_work	1
game ; event	1
None ; product ; organization	1
software ; computer ; organization	1
organization ; government_agency ; finance	1
building ; location ; event ; organization	1
organization ; person ; people ; None	1
software ; computer ; biology ; livingthing	1
government_agency ; None ; organization	1
military ; organization ; government_agency	1
medicine ; chemistry	1
event ; finance	1
None ; finance ; organization ; software	1
news_agency ; organization ; government_agency	1
military ; government_agency	1
military ; building ; organization	1
park ; geography	1
written_work ; event	1
organization ; government_agency ; people	1
government_agency ; organization ; people	1
newspaper ; internet ; news_agency	1
product ; finance ; None	1
location ; product ; transportation ; building ; chemistry	1
None ; building ; location	1
software ; organization ; internet	1
finance ; livingthing	1
software ; organization ; computer	1
government ; location ; event	1
product ; event ; news_agency ; internet	1
geography ; person ; people	1
person ; people ; None	1
transportation ; location ; park	1
organization ; finance ; software	1
organization ; news_agency ; broadcast_network ; broadcast	1
finance ; product ; organization	1
government ; person ; location ; organization	1
person ; god	1
train ; organization ; product	1
government_agency ; event ; government	1
location ; geography ; person	1
broadcast ; broadcast_network ; organization	1
None ; organization ; software	1
news_agency ; written_work ; organization	1
location ; people ; organization ; person	1
organization ; military ; person ; event	1
written_work ; product	1
building ; government_agency ; military	1
None ; written_work ; law	1
newspaper ; internet ; organization ; news_agency	1
product ; organization ; finance	1
internet ; product ; organization ; news_agency	1
education ; event ; written_work	1
organization ; education ; military	1
None ; computer ; product	1
product ; organization ; software	1
government_agency ; organization ; government ; None	1
product ; location ; organization	1
organization ; news_agency ; written_work ; internet	1
person ; people ; biology	1
location ; government_agency ; building	1
written_work ; internet ; product	1
product ; news_agency ; broadcast_network ; broadcast ; building	1
person ; organization ; news_agency	1
person ; news_agency	1
person ; building ; organization	1
written_work ; organization ; news_agency ; internet	1
organization ; broadcast_network ; broadcast	1
government_agency ; military ; organization ; building	1
music ; art ; written_work	1
organization ; news_agency ; newspaper ; internet	1
organization ; military ; person	1
product ; internet ; software ; organization	1
person ; event ; organization	1
written_work ; internet ; product ; organization	1
location ; transit ; building ; rail	1
play ; art ; written_work	1
organization ; location ; building	1
transit ; location ; building ; rail	1
newspaper ; organization ; internet	1
organization ; newspaper ; news_agency ; internet	1
written_work ; organization	1
product ; None ; organization	1
location ; event ; organization ; building	1
organization ; broadcast_network ; broadcast ; news_agency	1
written_work ; None	1
newspaper ; organization ; internet ; news_agency	1
government ; location ; organization	1
government_agency ; military ; organization	1
building ; None ; location ; organization	1
building ; government_agency	1
product ; organization ; building ; None	1
building ; organization ; military ; government_agency	1
organization ; news_agency ; newspaper	1
None ; organization ; software ; product	1
livingthing ; biology	1
government ; person ; organization	1
livingthing ; person	1
internet ; software ; product	1
government_agency ; government	1
person ; government_agency ; organization	1
god ; religion ; person	1
organization ; person ; military	1
organization ; product ; building	1
None ; written_work	1
software ; organization ; building ; internet	1
finance ; organization	1
organization ; food ; building	1
location ; organization ; government	1
computer ; software	1
newspaper ; news_agency ; organization	1
government_agency ; finance	1
None ; organization ; broadcast_program	1
government_agency ; organization ; event	1
written_work ; organization ; internet	1
location ; geography ; park ; building	1
person ; government_agency	1
product ; food	1
government_agency ; organization ; finance	1
organization ; military ; government_agency	1
location ; person ; people	1
organization ; product ; None	1
internet ; written_work ; None ; news_agency	1
government ; people ; government_agency ; person	1
location ; transportation ; building	1
astral_body ; building	1
government ; location ; None	1
software ; None ; product	1
product ; organization ; game	1
written_work ; education	1
art ; park ; building	1
location ; government_agency	1
