# Supplementary material
Source: ML conference proceedings conference paper supplement (https://aclanthology.org/2022.findings-acl.96)
Supplement: software [file crowdsourced_FIGER_layer1_labelset_nums_by_utypes.xlsx]

## Sheet: crowdsourced_FIGER_layer1_label
building ; organization	6
building ; transit	3
finance ; organization	3
internet ; news_agency	2
geography ; location	2
building ; park	1
finance ; government_agency	1
broadcast ; broadcast_network	1
military ; organization	1
building ; rail ; transit	1
biology ; livingthing	1
building ; rail	1
astral_body ; product	1
internet ; newspaper	1
organization ; person	1
building ; military	1
art ; broadcast_program	1
