# Supplementary material
Source: ML conference proceedings conference paper supplement (https://aclanthology.org/2022.findings-acl.96)
Supplement: software [file crowdsourced_FIGER_layer1_nums_by_mention.xlsx]

## Sheet: crowdsourced_FIGER_layer1_nums_
person	1865
organization	1499
location	1147
government_agency	454
product	327
building	179
internet	164
geography	135
government	133
people	132
news_agency	128
biology	99
None	91
park	87
finance	87
written_work	83
event	82
military	58
title	57
software	50
newspaper	44
art	22
astral_body	21
education	21
law	19
broadcast_program	18
transportation	16
broadcast	16
game	12
computer	12
broadcast_network	8
food	7
transit	7
rail	7
livingthing	6
god	4
music	4
play	3
chemistry	3
disease	1
medicine	1
award	1
train	1
time	1
religion	1
