# Supplementary material
Source: ML conference proceedings conference paper supplement (https://aclanthology.org/2022.findings-acl.96)
Supplement: software [file crowdsourced_FIGER_layer1_nums_by_utypes.xlsx]

## Sheet: crowdsourced_FIGER_layer1_nums_
person	389
organization	171
building	101
location	98
product	71
government_agency	56
None	53
written_work	43
event	36
software	25
internet	24
geography	23
military	21
art	21
law	18
finance	18
government	14
people	11
news_agency	11
broadcast_program	11
livingthing	10
astral_body	10
computer	9
park	8
food	8
transit	8
game	8
education	8
transportation	7
broadcast	5
time	5
newspaper	4
biology	4
god	4
chemistry	3
award	3
music	3
title	3
play	2
broadcast_network	2
rail	2
religion	1
medicine	1
train	1
disease	1
