# Supplementary material
Source: ML conference proceedings conference paper supplement (https://aclanthology.org/2022.findings-acl.96)
Supplement: software [file wiki_FIGER_layer1_cooccurrence_nums_by_mention.xlsx]

## Sheet: wiki_FIGER_layer1_cooccurrence_
park ; location	827
broadcast_program ; art	832
None ; event	885
organization ; government_agency	896
None ; software	917
computer ; software	924
broadcast ; broadcast_network	931
software ; internet	948
chemistry ; product	972
product ; chemistry	973
written_work ; None	982
None ; government	1003
written_work ; broadcast_program	1026
art ; written_work	1047
location ; person	1056
metropolitan_transit ; building	1111
government ; location	1117
person ; location	1143
biology ; chemistry	1154
education ; None	1172
event ; None	1172
chemistry ; medicine	1182
metropolitan_transit ; rail	1191
building ; park	1208
transit ; building	1217
building ; location	1251
written_work ; art	1291
park ; building	1293
organization ; building	1457
organization ; finance	1540
written_work ; religion	1563
person ; written_work	1584
chemistry ; biology	1590
rail ; metropolitan_transit	1740
title ; person	1825
broadcast_network ; broadcast	2013
education ; person	2188
location ; building	2372
person ; education	2519
broadcast_program ; written_work	2857
transportation ; location	3414
medicine ; chemistry	3742
geography ; location	4201
rail ; building	4627
location ; transportation	5254
organization ; person	5511
location ; geography	7400
person ; title	8952
person ; organization	14424
building ; rail	21024
product ; None	818
building ; organization	818
building ; None	788
building ; metropolitan_transit	768
organization ; internet	764
food ; livingthing	759
transit ; rail	756
software ; None	744
person ; god	737
livingthing ; biology	715
None ; person	706
organization ; broadcast	695
person ; people	673
education ; title	664
organization ; broadcast_network	652
art ; broadcast_program	650
software ; computer	642
person ; None	623
title ; education	620
people ; person	614
None ; product	610
person ; art	609
newspaper ; news_agency	605
art ; person	595
None ; education	592
religion ; organization	588
medicine ; biology	585
None ; written_work	579
government_agency ; None	570
person ; product	568
event ; building	559
education ; event	544
government_agency ; finance	544
biology ; medicine	540
broadcast_program ; game	536
food ; chemistry	532
location ; government_agency	523
location ; organization	514
organization ; location	510
internet ; software	504
finance ; person	500
software ; product	496
organization ; event	490
education ; organization	484
written_work ; game	467
None ; computer	461
time ; event	458
organization ; military	456
written_work ; event	452
government_agency ; organization	446
astral_body ; product	433
building ; product	424
location ; None	418
None ; geography	414
play ; music	407
None ; art	405
event ; organization	401
event ; government	381
finance ; law	377
product ; software	370
organization ; product	358
product ; computer	354
park ; geography	354
event ; art	353
computer ; product	348
art ; None	340
food ; biology	332
medicine ; education	331
person ; broadcast_program	329
food ; product	329
art ; game	325
news_agency ; internet	324
location ; government	322
art ; play	319
person ; music	310
product ; organization	309
music ; art	308
None ; location	305
organization ; None	301
medicine ; person	299
art ; event	298
None ; language	298
written_work ; person	297
None ; building	297
game ; art	297
written_work ; play	296
organization ; government	295
location ; park	292
person ; event	290
product ; food	290
organization ; written_work	289
None ; music	288
event ; award	287
None ; organization	285
product ; medicine	281
food ; location	281
building ; transportation	277
livingthing ; person	271
art ; music	270
language ; None	263
organization ; people	262
broadcast_program ; person	261
award ; event	261
event ; government_agency	260
god ; person	260
game ; event	260
medicine ; disease	260
rail ; transit	257
None ; internet	256
None ; biology	251
government ; None	250
organization ; news_agency	249
product ; internet	248
government ; organization	248
software ; organization	247
livingthing ; food	245
government_agency ; building	244
language ; art	242
building ; transit	242
product ; written_work	241
biology ; product	241
government_agency ; education	240
rail ; organization	239
location ; chemistry	237
government_agency ; event	230
chemistry ; food	227
music ; person	226
music ; written_work	226
transportation ; building	226
written_work ; language	225
education ; written_work	224
art ; visual_art	224
event ; game	224
computer ; None	223
education ; medicine	222
event ; person	217
person ; livingthing	217
art ; product	216
education ; language	214
art ; building	212
government ; event	211
newspaper ; internet	211
written_work ; education	208
internet ; organization	208
organization ; religion	208
product ; building	207
building ; military	204
military ; location	202
None ; visual_art	198
person ; game	198
event ; written_work	197
person ; finance	196
None ; law	193
person ; military	193
written_work ; music	193
event ; product	192
product ; event	192
broadcast_program ; event	192
government_agency ; location	191
game ; broadcast_program	191
play ; person	190
person ; internet	189
internet ; written_work	189
geography ; building	188
biology ; livingthing	186
written_work ; software	185
law ; None	185
None ; livingthing	185
geography ; park	183
military ; award	183
event ; location	182
product ; game	181
chemistry ; None	180
government ; person	176
None ; broadcast	176
None ; finance	176
written_work ; product	175
software ; person	175
organization ; education	175
education ; government_agency	174
building ; geography	171
person ; building	170
music ; play	170
None ; government_agency	169
location ; people	168
location ; event	165
event ; time	165
law ; written_work	163
building ; person	163
livingthing ; computer	163
chemistry ; education	162
product ; person	162
event ; education	155
game ; written_work	155
government_agency ; title	155
finance ; None	150
person ; language	150
computer ; organization	150
transportation ; rail	149
biology ; location	146
education ; law	145
written_work ; organization	145
play ; art	144
event ; music	142
software ; written_work	142
broadcast_program ; play	138
event ; law	131
government_agency ; product	130
None ; medicine	130
internet ; news_agency	130
art ; language	129
newspaper ; written_work	129
product ; biology	129
government_agency ; government	127
play ; broadcast_program	127
newspaper ; organization	126
people ; location	125
language ; person	125
biology ; disease	125
organization ; rail	123
written_work ; news_agency	121
art ; location	121
software ; news_agency	121
military ; building	121
building ; event	121
event ; language	121
None ; disease	120
rail ; location	120
disease ; event	119
event ; broadcast_program	119
None ; title	118
food ; None	118
body_part ; None	118
internet ; None	118
None ; religion	117
geography ; person	117
product ; education	116
building ; art	116
organization ; software	116
education ; building	115
internet ; broadcast	114
government_agency ; transportation	114
religion ; military	114
music ; None	113
government_agency ; person	113
news_agency ; written_work	112
game ; None	110
written_work ; government	108
location ; biology	108
education ; art	107
language ; written_work	106
None ; broadcast_program	105
government_agency ; military	105
product ; art	104
written_work ; law	104
livingthing ; art	104
title ; None	104
metropolitan_transit ; transit	104
broadcast_program ; broadcast	104
product ; location	103
game ; person	102
art ; education	101
written_work ; finance	101
None ; transportation	100
building ; government_agency	99
law ; event	99
software ; game	99
art ; organization	97
broadcast_program ; music	97
food ; medicine	96
train ; rail	96
finance ; event	96
product ; geography	95
internet ; person	95
person ; government_agency	95
education ; computer	94
geography ; biology	94
time ; None	93
event ; religion	93
broadcast ; None	92
organization ; metropolitan_transit	92
music ; broadcast_program	92
location ; military	92
written_work ; internet	92
person ; broadcast_network	91
person ; broadcast	91
law ; computer	91
disease ; product	91
event ; finance	90
geography ; None	90
organization ; law	90
event ; title	88
biology ; geography	88
astral_body ; event	88
medicine ; None	88
government_agency ; art	87
event ; military	87
event ; software	86
building ; internet	86
organization ; title	86
broadcast_program ; award	86
government ; people	85
award ; military	85
location ; art	84
None ; chemistry	84
education ; biology	83
organization ; park	83
religion ; people	82
rail ; person	81
location ; product	80
organization ; geography	80
law ; title	80
rail ; train	80
transit ; metropolitan_transit	79
internet ; product	79
biology ; food	77
art ; livingthing	75
medicine ; product	75
law ; government	74
event ; geography	74
finance ; organization	73
law ; education	72
product ; livingthing	72
location ; astral_body	71
religion ; art	71
event ; transportation	70
finance ; product	70
None ; people	68
organization ; art	68
news_agency ; newspaper	68
internet ; newspaper	68
biology ; None	67
broadcast_program ; location	67
livingthing ; music	67
food ; organization	67
None ; astral_body	67
written_work ; computer	66
visual_art ; music	66
written_work ; location	66
geography ; astral_body	64
government_agency ; news_agency	63
news_agency ; art	63
title ; law	62
astral_body ; None	61
written_work ; building	61
broadcast_program ; broadcast_network	61
award ; education	60
broadcast_network ; organization	60
people ; title	59
product ; finance	58
astral_body ; location	58
software ; building	58
location ; broadcast	57
law ; product	56
None ; news_agency	56
music ; event	55
play ; written_work	55
visual_art ; play	55
location ; education	55
military ; None	55
park ; transportation	55
None ; time	54
building ; written_work	54
body_part ; chemistry	54
visual_art ; chemistry	54
park ; art	54
event ; rail	54
government ; government_agency	53
title ; award	53
broadcast_program ; organization	53
location ; rail	52
god ; livingthing	52
event ; chemistry	52
broadcast_program ; product	52
product ; metropolitan_transit	52
train ; music	52
livingthing ; None	51
education ; government	51
language ; visual_art	50
organization ; award	50
metropolitan_transit ; None	50
broadcast ; organization	50
event ; visual_art	49
education ; chemistry	49
government_agency ; written_work	48
geography ; art	48
biology ; education	48
game ; music	48
None ; god	47
music ; product	46
product ; astral_body	46
computer ; geography	46
person ; play	46
rail ; park	46
disease ; None	46
organization ; broadcast_program	46
news_agency ; None	45
education ; geography	45
product ; language	45
food ; person	45
software ; broadcast_program	45
product ; news_agency	44
product ; music	44
people ; government	44
computer ; news_agency	44
astral_body ; geography	44
language ; education	43
education ; software	43
broadcast_program ; None	43
transportation ; None	43
body_part ; product	42
title ; event	41
award ; person	41
broadcast ; news_agency	40
livingthing ; product	40
livingthing ; location	40
game ; product	40
art ; park	40
person ; award	40
education ; product	39
people ; organization	39
software ; finance	39
building ; computer	39
computer ; event	39
military ; organization	39
time ; education	38
None ; game	38
location ; title	37
product ; transportation	36
art ; religion	36
None ; food	36
people ; biology	36
None ; award	36
metropolitan_transit ; train	36
product ; government_agency	35
computer ; internet	35
product ; train	35
language ; music	35
game ; title	35
people ; geography	35
geography ; people	35
art ; title	35
person ; geography	35
body_part ; time	34
language ; building	34
location ; livingthing	34
software ; event	34
train ; product	34
finance ; written_work	34
broadcast ; internet	34
play ; event	33
music ; education	33
government ; education	33
finance ; art	33
geography ; transportation	33
location ; broadcast_program	33
title ; art	33
computer ; chemistry	33
medicine ; art	33
location ; music	33
organization ; music	33
livingthing ; broadcast_program	33
internet ; music	33
finance ; internet	33
written_work ; time	32
product ; broadcast_program	32
game ; software	32
computer ; language	31
software ; education	31
computer ; written_work	31
military ; education	31
building ; education	31
body_part ; disease	31
building ; finance	30
language ; organization	30
award ; organization	30
visual_art ; None	29
music ; news_agency	29
person ; government	29
art ; finance	29
title ; broadcast_program	29
music ; game	29
written_work ; geography	28
geography ; product	28
law ; organization	28
education ; music	28
religion ; event	28
biology ; person	28
product ; rail	28
title ; government_agency	27
broadcast ; music	27
language ; chemistry	27
event ; food	27
written_work ; title	27
award ; None	27
disease ; chemistry	27
location ; god	26
government ; broadcast_program	26
event ; disease	26
rail ; transportation	26
music ; location	26
livingthing ; god	26
event ; internet	26
government_agency ; park	25
geography ; chemistry	25
location ; written_work	25
location ; religion	25
government_agency ; software	25
art ; internet	25
astral_body ; person	25
computer ; education	24
broadcast ; product	24
government ; military	24
park ; organization	24
finance ; government_agency	24
chemistry ; person	24
religion ; None	24
internet ; broadcast_program	24
game ; location	23
written_work ; park	23
computer ; law	23
government ; award	23
medicine ; religion	22
art ; god	22
person ; biology	22
person ; rail	22
news_agency ; product	22
government ; music	22
visual_art ; language	22
broadcast_program ; building	22
geography ; organization	22
art ; geography	22
people ; language	22
event ; people	22
language ; people	22
game ; livingthing	22
software ; law	22
computer ; location	22
people ; written_work	22
organization ; game	22
park ; None	22
game ; language	22
education ; play	22
game ; organization	22
train ; None	22
metropolitan_transit ; park	22
title ; people	22
language ; food	22
education ; broadcast_program	22
newspaper ; person	22
news_agency ; person	22
art ; law	22
title ; location	22
person ; news_agency	22
military ; transportation	22
geography ; education	22
organization ; livingthing	22
livingthing ; organization	22
broadcast_program ; park	22
education ; astral_body	21
food ; building	21
medicine ; music	21
event ; play	20
music ; time	20
building ; broadcast_program	20
person ; food	20
military ; broadcast_program	20
body_part ; biology	20
building ; play	20
music ; organization	20
disease ; medicine	20
astral_body ; chemistry	19
None ; park	19
language ; product	19
building ; religion	19
government_agency ; broadcast	19
news_agency ; broadcast	19
award ; building	18
organization ; train	18
music ; religion	18
military ; person	18
education ; visual_art	18
transportation ; geography	18
game ; play	18
medicine ; event	18
internet ; computer	17
person ; law	17
title ; language	17
building ; award	17
award ; title	17
broadcast ; broadcast_program	17
event ; medicine	17
time ; broadcast_program	17
location ; game	17
law ; software	17
music ; livingthing	16
time ; written_work	16
body_part ; food	16
astral_body ; livingthing	16
internet ; event	16
event ; biology	16
language ; event	16
person ; disease	16
geography ; government_agency	16
visual_art ; biology	15
person ; computer	15
astral_body ; written_work	15
internet ; finance	15
religion ; person	15
park ; written_work	15
government_agency ; geography	15
broadcast_program ; education	15
art ; food	15
education ; news_agency	14
education ; internet	14
medicine ; food	14
medicine ; body_part	14
visual_art ; medicine	14
product ; award	14
award ; written_work	14
broadcast ; art	14
metropolitan_transit ; product	14
location ; law	14
location ; time	13
time ; government	13
written_work ; livingthing	13
broadcast_program ; livingthing	13
livingthing ; disease	13
geography ; event	13
organization ; transit	13
law ; location	13
god ; None	13
military ; government_agency	13
chemistry ; event	12
written_work ; visual_art	12
geography ; military	12
broadcast ; person	12
broadcast_network ; person	12
person ; chemistry	12
rail ; art	12
broadcast_program ; language	12
location ; finance	12
software ; broadcast	12
language ; news_agency	11
astral_body ; organization	11
broadcast ; government_agency	11
broadcast ; building	11
building ; news_agency	11
art ; news_agency	11
biology ; music	11
medicine ; title	11
food ; event	11
software ; transportation	11
government_agency ; game	11
government ; art	11
broadcast_network ; location	11
time ; person	11
art ; government_agency	11
news_agency ; software	11
title ; written_work	11
title ; organization	11
finance ; title	11
chemistry ; government_agency	11
person ; visual_art	11
train ; organization	11
park ; broadcast_program	11
livingthing ; people	11
food ; game	11
disease ; art	11
livingthing ; geography	11
music ; people	11
time ; music	11
medicine ; law	11
government ; building	11
location ; play	11
art ; body_part	11
government_agency ; music	11
biology ; building	11
biology ; rail	11
chemistry ; location	11
location ; internet	11
location ; software	11
religion ; game	11
religion ; broadcast_program	11
geography ; broadcast_program	11
music ; software	11
language ; game	11
title ; music	11
train ; livingthing	11
newspaper ; product	11
chemistry ; art	11
person ; religion	11
game ; religion	11
game ; military	11
government ; law	11
livingthing ; play	11
written_work ; award	11
award ; astral_body	11
livingthing ; language	11
people ; internet	11
chemistry ; software	11
art ; medicine	11
art ; chemistry	11
person ; medicine	11
medicine ; broadcast_program	11
organization ; language	11
military ; park	11
language ; livingthing	11
broadcast_program ; god	11
play ; None	11
language ; computer	11
internet ; education	11
broadcast ; title	11
broadcast_network ; title	11
finance ; astral_body	11
play ; title	11
play ; location	11
game ; medicine	11
game ; chemistry	11
food ; god	11
broadcast_network ; internet	11
transportation ; transit	11
education ; religion	11
body_part ; art	11
body_part ; building	11
title ; product	11
software ; medicine	11
broadcast_program ; time	11
transportation ; internet	11
people ; astral_body	11
organization ; astral_body	11
product ; visual_art	11
written_work ; astral_body	11
law ; building	11
internet ; play	11
music ; building	11
product ; god	11
broadcast ; written_work	11
education ; award	11
geography ; god	11
event ; broadcast	11
None ; body_part	11
religion ; play	11
park ; product	11
broadcast ; newspaper	11
astral_body ; park	11
livingthing ; software	11
art ; biology	11
geography ; title	11
food ; disease	11
transportation ; park	11
broadcast_program ; geography	11
transportation ; music	11
livingthing ; written_work	11
language ; location	11
music ; computer	11
rail ; product	11
broadcast_program ; internet	11
law ; finance	10
organization ; food	10
internet ; game	10
internet ; building	10
person ; software	9
play ; god	9
None ; metropolitan_transit	9
None ; rail	9
government_agency ; internet	9
chemistry ; disease	8
language ; government_agency	8
title ; game	8
god ; title	8
food ; geography	8
chemistry ; geography	8
art ; military	8
art ; transportation	8
religion ; award	8
product ; park	8
finance ; software	8
broadcast ; software	7
astral_body ; art	7
broadcast_program ; news_agency	7
broadcast_network ; news_agency	7
broadcast_program ; medicine	7
broadcast_program ; disease	7
military ; event	7
people ; None	7
product ; disease	7
music ; language	6
astral_body ; education	6
building ; title	6
god ; building	6
building ; music	6
law ; disease	6
medicine ; computer	6
chemistry ; computer	6
park ; person	6
biology ; art	6
broadcast ; god	6
game ; internet	6
organization ; computer	6
broadcast_network ; product	6
internet ; government_agency	6
computer ; astral_body	5
music ; internet	5
train ; metropolitan_transit	5
biology ; event	5
software ; language	5
disease ; livingthing	5
park ; event	5
military ; people	5
livingthing ; game	5
computer ; art	4
product ; title	4
event ; computer	4
law ; government_agency	4
broadcast_program ; people	4
written_work ; military	4
art ; software	4
internet ; broadcast_network	4
building ; astral_body	4
finance ; location	3
government_agency ; rail	3
food ; body_part	3
organization ; biology	3
news_agency ; event	3
disease ; government	3
finance ; building	3
law ; person	3
transit ; location	3
transportation ; event	3
event ; body_part	3
building ; software	3
person ; astral_body	3
park ; rail	3
written_work ; government_agency	3
geography ; internet	3
written_work ; broadcast	3
None ; newspaper	2
religion ; product	2
metropolitan_transit ; location	2
award ; product	2
food ; computer	2
food ; art	2
software ; music	2
education ; finance	2
park ; metropolitan_transit	2
disease ; internet	2
disease ; written_work	2
disease ; person	2
organization ; newspaper	1
software ; people	1
internet ; people	1
rail ; computer	1
metropolitan_transit ; computer	1
software ; food	1
news_agency ; organization	1
building ; broadcast	1
military ; product	1
god ; disease	1
award ; art	1
geography ; award	1
award ; finance	1
food ; music	1
building ; food	1
biology ; software	1
building ; livingthing	1
art ; award	1
product ; play	1
