# Supplementary material
Source: ML conference proceedings conference paper supplement (https://aclanthology.org/2022.findings-acl.96)
Supplement: software [file wiki_FIGER_layer1_labelset_nums_by_mention.xlsx]

## Sheet: wiki_FIGER_layer1_labelset_nums
location ; person ; government	1
rail ; transportation	1
person ; chemistry	1
organization ; newspaper ; news_agency ; internet	1
software ; internet ; people	1
None ; event ; law	1
product ; internet ; None	1
None ; computer ; product	1
visual_art ; biology	1
written_work ; product ; language	1
written_work ; art ; visual_art	1
location ; organization ; finance	1
education ; internet	1
product ; location ; transportation	1
rail ; metropolitan_transit ; building ; computer	1
building ; product ; music	1
written_work ; None ; art	1
event ; software ; None ; food	1
person ; finance	1
transportation ; location ; rail ; building	1
software ; broadcast_program	1
location ; military ; organization	1
software ; product ; computer	1
organization ; broadcast_network ; broadcast ; person	1
person ; event ; written_work	1
news_agency ; organization	1
person ; location ; organization	1
product ; organization ; internet	1
building ; None ; broadcast	1
military ; product	1
person ; law	1
music ; language	1
geography ; location ; military	1
god ; disease	1
award ; art	1
park ; building ; rail	1
person ; food	1
broadcast_program ; art ; game	1
geography ; award	1
software ; broadcast ; product	1
law ; None ; finance	1
None ; geography ; location	1
award ; finance	1
written_work ; art ; broadcast_program	1
geography ; location ; None	1
organization ; finance ; person ; software	1
person ; organization ; software	1
food ; music	1
building ; food	1
biology ; software ; None	1
written_work ; game ; product	1
art ; written_work ; event	1
chemistry ; event	1
education ; government	1
building ; livingthing	1
person ; written_work ; product	1
None ; location ; building	1
music ; art ; person	1
product ; person ; organization	1
government_agency ; person ; title	1
news_agency ; written_work ; internet	1
building ; organization ; written_work ; park	1
art ; award	1
written_work ; product ; play ; broadcast_program	1
government_agency ; organization ; park	1
None ; newspaper	2
title ; person ; event	2
None ; art ; language	2
organization ; food	2
astral_body ; chemistry	2
product ; food ; chemistry ; biology	2
None ; product ; food	2
religion ; product	2
event ; location ; transportation	2
medicine ; chemistry ; person	2
language ; person ; written_work	2
software ; education ; product	2
building ; None ; park	2
product ; rail ; metropolitan_transit	2
government_agency ; park	2
game ; broadcast_program ; art	2
broadcast_program ; game ; art	2
medicine ; chemistry ; product	2
organization ; computer	2
rail ; metropolitan_transit ; building ; location	2
written_work ; broadcast_program ; product	2
game ; broadcast_program ; written_work	2
None ; award ; product	2
game ; person ; title	2
None ; written_work ; software	2
food ; computer	2
religion ; None	2
food ; art	2
building ; computer ; product	2
broadcast_program ; written_work ; livingthing	2
broadcast_program ; person ; written_work	2
broadcast_program ; person ; broadcast_network	2
location ; park ; transportation	2
software ; music	2
education ; finance	2
park ; rail ; metropolitan_transit	2
disease ; internet ; written_work ; person	2
software ; education ; organization ; internet	3
finance ; location	3
government_agency ; building ; rail	3
food ; body_part	3
organization ; None ; biology	3
organization ; location ; building	3
education ; news_agency ; None ; event	3
park ; building ; person	3
livingthing ; product ; person	3
product ; software ; organization ; internet	3
rail ; metropolitan_transit ; transit	3
disease ; government	3
music ; broadcast_program ; written_work	3
law ; None ; government	3
finance ; building	3
law ; person	3
transit ; location ; building	3
product ; written_work ; game	3
park ; person	3
None ; internet ; software	3
transportation ; event	3
None ; livingthing ; person	3
event ; body_part	3
game ; art ; broadcast_program	3
organization ; person ; product	3
building ; product ; software ; internet	3
person ; astral_body	3
organization ; written_work ; government_agency ; finance	3
geography ; internet	3
government_agency ; person	3
written_work ; broadcast	3
location ; building ; None	3
None ; software ; finance	4
computer ; art	4
education ; event ; building	4
broadcast_program ; person ; product	4
event ; building ; location	4
written_work ; religion ; person	4
park ; written_work ; location	4
building ; art ; park	4
government_agency ; organization ; written_work	4
person ; organization ; computer	4
product ; title ; person	4
art ; title ; person	4
event ; computer	4
art ; written_work ; organization	4
law ; government_agency	4
None ; government ; broadcast_program ; people	4
organization ; None ; person	4
government_agency ; geography	4
None ; software ; internet	4
organization ; government_agency ; title	4
building ; geography ; park	4
person ; internet ; product	4
astral_body ; geography ; location	4
written_work ; military	4
person ; None ; art	4
art ; software	4
broadcast ; internet ; broadcast_network	4
building ; astral_body	4
software ; None ; building	4
None ; art ; music	4
music ; language ; art	5
building ; music	5
building ; person ; organization	5
computer ; astral_body	5
organization ; building ; rail	5
rail ; building ; location	5
building ; art ; park ; location	5
music ; livingthing	5
person ; law ; education	5
None ; government ; organization	5
broadcast_program ; person ; education	5
music ; internet	5
train ; metropolitan_transit	5
None ; person ; livingthing	5
written_work ; event ; location	5
transit ; metropolitan_transit ; rail	5
biology ; event	5
software ; language ; event	5
disease ; livingthing	5
park ; event	5
None ; chemistry ; product	5
food ; biology ; product	5
organization ; religion ; military ; people	5
organization ; people ; person	5
organization ; product ; event	5
livingthing ; None ; game	5
law ; computer ; software	5
astral_body ; chemistry ; education	6
None ; written_work ; product ; internet	6
written_work ; location ; geography	6
building ; award ; title	6
organization ; written_work ; building	6
person ; education ; music	6
god ; building	6
building ; location ; organization	6
law ; disease ; event	6
organization ; building ; park	6
education ; person ; event	6
organization ; location ; military	6
medicine ; chemistry ; computer	6
location ; game	6
biology ; art	6
person ; broadcast ; god	6
game ; internet	6
product ; education ; person	6
government_agency ; organization ; building	6
broadcast ; broadcast_network ; product	6
None ; internet ; government_agency	6
education ; computer ; software	6
music ; written_work ; religion	7
person ; software	7
broadcast ; software	7
art ; music ; game	7
astral_body ; art	7
organization ; None ; event	7
broadcast_program ; broadcast_network ; broadcast ; news_agency	7
broadcast_program ; None ; medicine ; disease	7
music ; written_work ; broadcast_program	7
biology ; food ; chemistry ; medicine	7
military ; person	7
military ; event	7
biology ; disease ; product ; chemistry	7
broadcast ; organization	7
organization ; location ; geography	7
people ; None ; title	7
written_work ; product ; game ; broadcast_program	7
building ; transit ; rail ; metropolitan_transit	7
software ; written_work ; None ; computer	7
title ; person ; broadcast_program	7
product ; disease ; None	7
organization ; software ; product	7
finance ; software ; internet	7
location ; people ; title	8
biology ; product ; chemistry	8
chemistry ; biology ; disease ; product	8
park ; art ; building	8
person ; organization ; food	8
None ; music ; art	8
language ; organization ; government_agency	8
location ; person ; title	8
person ; title ; game	8
person ; god ; title	8
food ; location ; chemistry ; geography	8
game ; music ; None	8
art ; person ; military	8
art ; transportation ; building ; location	8
organization ; religion ; military ; award	8
written_work ; None ; language	8
organization ; product ; park	8
broadcast ; internet	8
game ; event ; art	8
building ; organization ; written_work	8
None ; language ; product	8
written_work ; game ; broadcast_program ; art	8
computer ; written_work	9
play ; person ; god	9
law ; finance	9
music ; time	9
art ; event ; title	9
park ; art ; building ; location	9
event ; military ; None ; broadcast_program	9
organization ; software ; internet	9
event ; play ; music	9
building ; broadcast_program ; play	9
building ; education	9
None ; metropolitan_transit ; rail	9
organization ; person ; building	9
music ; organization	9
government_agency ; organization ; internet ; news_agency	9
None ; broadcast_program ; art	9
disease ; medicine	9
art ; None ; written_work	9
education ; organization ; internet	10
education ; computer ; chemistry	10
medicine ; music	10
internet ; game	10
None ; event ; product	10
broadcast_program ; education ; person	10
broadcast ; organization ; broadcast_network	10
software ; None ; computer	10
person ; organization ; broadcast ; broadcast_network	10
internet ; building	10
education ; event ; art	10
person ; art ; broadcast_program	10
music ; None ; event	11
language ; news_agency	11
art ; education ; None	11
music ; play ; person	11
play ; event ; written_work ; person	11
art ; written_work ; language ; None	11
product ; computer ; education	11
location ; astral_body ; product ; organization	11
location ; person ; organization	11
product ; organization ; news_agency ; written_work	11
education ; None ; event	11
None ; art ; visual_art	11
art ; visual_art ; None	11
music ; education ; written_work	11
music ; education	11
None ; music ; product	11
broadcast ; government_agency ; building ; news_agency ; None	11
art ; education ; event	11
event ; art ; game ; location	11
language ; organization ; person	11
written_work ; location ; None	11
written_work ; art ; news_agency	11
product ; chemistry ; None	11
biology ; music	11
medicine ; title	11
food ; location ; chemistry ; event	11
person ; location ; building ; rail	11
software ; None ; transportation	11
education ; government_agency ; None	11
government_agency ; None ; game	11
news_agency ; product ; internet	11
government ; art ; music	11
broadcast_network ; location	11
location ; building ; person ; organization	11
transit ; rail ; metropolitan_transit	11
art ; written_work ; livingthing	11
time ; person	11
art ; location ; government_agency	11
None ; education ; person ; product	11
None ; software ; product	11
news_agency ; product ; internet ; software	11
person ; title ; written_work	11
person ; location ; broadcast_program	11
written_work ; art ; visual_art ; language	11
broadcast_program ; building ; written_work	11
event ; education ; person	11
written_work ; government ; None	11
geography ; None ; location	11
title ; organization ; government_agency ; person	11
title ; art	11
None ; building ; organization	11
organization ; finance ; law	11
finance ; person ; title	11
education ; news_agency	11
geography ; location ; organization	11
None ; art ; organization ; person	11
language ; building	11
music ; livingthing ; art	11
chemistry ; government_agency ; None	11
geography ; person ; location	11
written_work ; government ; location	11
language ; person ; None ; visual_art	11
game ; None ; art	11
person ; product ; education ; event ; None	11
train ; organization	11
art ; geography	11
person ; language ; None	11
chemistry ; biology ; food ; product	11
park ; broadcast_program	11
event ; None ; people ; government	11
livingthing ; food ; person	11
written_work ; law ; None	11
location ; building ; person	11
language ; visual_art	11
language ; organization ; person ; None ; people	11
location ; livingthing ; people	11
event ; education ; art	11
food ; game ; livingthing ; person	11
written_work ; art ; None	11
chemistry ; product ; None	11
visual_art ; language ; music	11
None ; written_work ; person	11
livingthing ; music ; art ; person	11
government ; music	11
disease ; art	11
music ; person ; None	11
metropolitan_transit ; transit ; rail	11
written_work ; broadcast_program ; music	11
computer ; software ; law	11
livingthing ; computer ; location ; geography	11
location ; organization ; geography	11
music ; people	11
time ; music	11
education ; event ; product	11
music ; event ; written_work	11
music ; game ; person	11
location ; government ; person	11
people ; person ; written_work	11
park ; None ; geography ; location	11
person ; language ; None ; music	11
body_part ; chemistry ; product	11
medicine ; law	11
education ; computer ; None	11
location ; government ; None ; building	11
location ; play	11
medicine ; art ; music	11
art ; body_part	11
location ; government_agency ; music	11
art ; person ; education	11
person ; title ; art	11
biology ; building ; rail	11
chemistry ; food ; location	11
art ; event ; broadcast_program	11
art ; education ; event ; organization	11
building ; military ; location	11
organization ; government_agency ; None	11
person ; organization ; music	11
location ; internet ; software	11
music ; written_work ; religion ; game ; art ; broadcast_program	11
event ; building ; None ; person	11
location ; geography ; person ; broadcast_program	11
building ; park ; None	11
chemistry ; medicine ; person ; education	11
person ; law ; organization	11
body_part ; product	11
music ; software	11
food ; location ; chemistry ; None	11
language ; game	11
person ; None ; music	11
art ; broadcast_program ; event ; music ; play	11
written_work ; broadcast_program ; play ; art	11
title ; None ; person ; music	11
education ; None ; person ; music	11
person ; education ; None ; music	11
game ; product ; broadcast_program	11
train ; livingthing	11
location ; person ; art	11
location ; organization ; person	11
art ; written_work ; music	11
newspaper ; product	11
location ; geography ; military	11
chemistry ; medicine ; art	11
title ; person ; None	11
education ; person ; None	11
event ; food ; location ; chemistry	11
product ; location ; person	11
newspaper ; organization ; written_work	11
written_work ; art ; person ; None	11
people ; person ; location ; organization	11
people ; written_work	11
person ; religion	11
event ; written_work ; language ; art	11
game ; organization ; religion ; military	11
government ; law	11
train ; None	11
building ; person ; location	11
language ; product	11
park ; transportation ; building	11
building ; rail ; metropolitan_transit ; park	11
play ; art ; broadcast_program	11
product ; train ; None	11
livingthing ; play	11
building ; broadcast_program	11
written_work ; event ; broadcast_program ; award	11
government_agency ; None ; finance	11
location ; product ; person	11
location ; broadcast_program	11
art ; broadcast_program ; livingthing	11
award ; astral_body	11
art ; product ; geography	11
None ; broadcast_program ; written_work	11
military ; education ; person	11
None ; education ; government_agency	11
organization ; education ; building	11
livingthing ; language	11
people ; internet	11
chemistry ; software	11
chemistry ; person ; None	11
art ; medicine ; chemistry	11
education ; biology ; medicine	11
language ; food	11
None ; product ; event	11
chemistry ; biology ; product ; food	11
person ; None ; title	11
biology ; location ; geography	11
person ; medicine ; education ; art ; broadcast_program	11
organization ; language	11
building ; military ; park	11
language ; food ; livingthing	11
art ; person ; title	11
event ; art ; visual_art	11
language ; art ; visual_art	11
None ; product ; written_work	11
art ; broadcast_program ; organization	11
broadcast_program ; god	11
language ; people	11
park ; location ; transportation	11
product ; livingthing ; person ; art	11
person ; computer	11
play ; None	11
written_work ; language ; computer	11
art ; broadcast_program ; product	11
software ; internet ; written_work ; education ; person	11
person ; education ; broadcast_program	11
person ; building ; rail	11
None ; person ; title	11
broadcast ; broadcast_network ; person ; title	11
livingthing ; None ; person	11
broadcast_program ; written_work ; art ; game ; event	11
biology ; education ; person	11
geography ; astral_body ; None ; chemistry	11
finance ; astral_body	11
play ; person ; title ; location ; art	11
park ; art	11
software ; news_agency ; internet ; written_work	11
game ; medicine ; chemistry	11
person ; food ; livingthing	11
food ; god	11
broadcast_network ; organization ; internet	11
transportation ; building ; transit ; rail	11
person ; music ; location	11
product ; language	11
event ; organization ; music	11
education ; religion ; None	11
person ; education ; written_work	11
person ; organization ; broadcast_program ; written_work	11
education ; person ; art	11
organization ; person ; education	11
person ; education ; title ; None	11
body_part ; art ; building	11
person ; education ; None	11
title ; person ; product	11
play ; art ; person	11
art ; play ; broadcast_program	11
None ; software ; broadcast_program	11
military ; broadcast_program	11
software ; medicine ; person	11
broadcast_program ; time ; event	11
award ; title	11
art ; location ; person	11
None ; art ; organization	11
organization ; internet ; written_work	11
transportation ; None ; internet	11
government_agency ; transportation	11
person ; language ; None ; chemistry	11
people ; astral_body	11
organization ; astral_body	11
software ; building ; None ; product	11
product ; art ; visual_art	11
written_work ; astral_body	11
organization ; livingthing	11
None ; art ; person	11
art ; person ; broadcast_program	11
art ; None ; person	11
language ; None ; art	11
software ; law ; building	11
organization ; product ; internet	11
internet ; written_work ; play	11
title ; None ; event	11
music ; building	11
None ; person ; art ; organization ; music	11
location ; organization ; building	11
broadcast_program ; art ; person ; event	11
location ; government_agency ; building	11
event ; software ; internet ; product	11
product ; god	11
broadcast ; written_work	11
event ; None ; written_work	11
education ; person ; award	11
computer ; location ; product	11
event ; None ; art	11
art ; game ; person ; broadcast_program	11
event ; person ; people ; organization	11
food ; biology ; livingthing	11
language ; event	11
geography ; location ; person	11
software ; person ; organization	11
geography ; god	11
event ; broadcast	11
religion ; None ; person	11
None ; body_part	11
written_work ; religion ; art ; play	11
biology ; chemistry ; None	11
building ; art ; play	11
art ; broadcast_program ; play	11
park ; product ; building	11
person ; title ; location	11
person ; music ; broadcast_program	11
art ; game ; music ; written_work	11
written_work ; art ; person	11
body_part ; disease	11
location ; building ; park	11
broadcast ; newspaper ; news_agency ; internet	11
law ; computer ; product	11
person ; organization ; livingthing	11
astral_body ; park	11
None ; event ; location	11
food ; livingthing ; location	11
None ; product ; software	11
finance ; person	11
internet ; None ; software	11
broadcast_program ; product ; art	11
person ; None ; language	11
broadcast ; organization ; news_agency	11
software ; None ; broadcast_program	11
broadcast_program ; location ; game	11
food ; chemistry ; biology	11
art ; livingthing ; music	11
event ; None ; education ; software	11
location ; finance	11
livingthing ; software	11
art ; biology	11
location ; geography ; organization	11
person ; broadcast_program ; art	11
geography ; title	11
None ; person ; language	11
biology ; food ; disease ; product	11
location ; music ; art ; person ; organization	11
art ; education ; person ; title	11
music ; art ; written_work	11
organization ; title	11
disease ; medicine ; None	11
music ; art ; product	11
government_agency ; location ; geography	11
art ; livingthing ; person	11
music ; person ; education	11
title ; award ; person	11
livingthing ; organization	11
game ; written_work ; art	11
organization ; software ; person	11
transportation ; park	11
building ; award	11
written_work ; person ; game	11
broadcast_program ; written_work ; game ; person	11
broadcast_program ; park ; geography ; art	11
transportation ; location ; music	11
finance ; organization ; None	11
religion ; organization ; military	11
person ; event ; organization	11
written_work ; organization ; art	11
music ; person ; art ; broadcast_program	11
music ; event ; time	11
art ; music ; person	11
livingthing ; written_work	11
food ; organization ; product	11
language ; location	11
software ; finance ; internet	11
broadcast_program ; park ; building ; written_work	11
broadcast_network ; broadcast ; organization	11
art ; broadcast_program ; person	11
art ; game ; livingthing ; organization	11
person ; broadcast_program ; event	11
broadcast_program ; person ; art	11
broadcast ; broadcast_network ; organization	11
event ; rail	11
music ; computer	11
astral_body ; geography ; person	11
rail ; product	11
software ; broadcast_program ; broadcast ; internet	11
rail ; building ; metropolitan_transit ; park	11
music ; person ; art	11
organization ; software ; broadcast_program	11
game ; location	12
product ; computer ; internet ; software	12
None ; location ; geography	12
geography ; biology	12
art ; broadcast_program ; written_work	12
education ; event ; person	12
None ; event ; religion	12
None ; news_agency	12
event ; finance ; None	12
location ; person ; geography	12
food ; chemistry ; medicine ; biology	12
building ; rail ; art	12
person ; organization ; education	12
broadcast_program ; language ; person	12
organization ; person ; broadcast_network	12
government_agency ; building ; military	12
chemistry ; biology ; product ; medicine	12
product ; game ; event	12
military ; building	12
broadcast_program ; game ; person	12
computer ; law ; software	12
organization ; government_agency ; building	12
location ; time ; government	13
written_work ; event ; art	13
person ; product ; None	13
product ; None ; computer	13
computer ; education	13
geography ; location ; park	13
language ; music	13
livingthing ; disease	13
geography ; event	13
product ; music	13
organization ; transit ; rail	13
religion ; organization ; event	13
written_work ; product ; broadcast_program	13
law ; location	13
god ; None	13
broadcast_program ; broadcast	13
law ; product ; computer	13
art ; park ; building	13
location ; transportation ; rail	13
award ; military ; organization	13
finance ; organization ; person	13
software ; event	13
building ; metropolitan_transit ; rail	13
military ; government_agency	13
astral_body ; geography	13
art ; play ; person	14
geography ; chemistry	14
chemistry ; medicine ; food	14
location ; None ; geography	14
location ; geography ; building	14
medicine ; body_part	14
visual_art ; medicine ; biology ; chemistry	14
product ; award ; written_work	14
location ; organization ; government_agency	14
broadcast_program ; broadcast ; art	14
astral_body ; person	14
metropolitan_transit ; product	14
location ; law	14
None ; art ; written_work	14
person ; event ; title	14
person ; award	14
organization ; news_agency ; written_work	15
software ; education	15
broadcast_program ; person ; play	15
None ; event ; music	15
education ; medicine ; person	15
news_agency ; internet	15
education ; product	15
music ; location	15
person ; title ; award	15
event ; internet	15
None ; written_work ; government	15
religion ; event	15
astral_body ; written_work	15
broadcast_program ; written_work ; music	15
government ; person ; location	15
park ; geography ; art	15
internet ; finance	15
written_work ; finance ; law	15
software ; computer ; None	15
event ; food	15
chemistry ; biology ; product ; food ; medicine	15
organization ; person ; finance ; internet	15
art ; food	15
written_work ; art ; game	15
internet ; person ; organization	16
language ; chemistry	16
art ; organization	16
organization ; metropolitan_transit ; rail	16
title ; government_agency	16
time ; written_work	16
chemistry ; medicine ; product	16
body_part ; food	16
astral_body ; livingthing	16
software ; internet ; event	16
event ; biology	16
internet ; organization ; person	16
None ; astral_body ; geography	16
person ; disease	16
written_work ; None ; education	16
newspaper ; organization	16
written_work ; building	16
written_work ; broadcast_program ; None	16
art ; written_work ; game	16
person ; written_work ; None	16
geography ; government_agency	16
broadcast ; product	17
None ; location ; park	17
internet ; software ; news_agency	17
art ; written_work ; building	17
internet ; computer	17
None ; medicine ; disease	17
event ; title ; language	17
event ; language ; art ; visual_art	17
person ; None ; organization	17
event ; education	17
government_agency ; product	17
location ; park ; geography	17
broadcast ; broadcast_program ; broadcast_network	17
event ; medicine	17
award ; organization	17
time ; broadcast_program	17
people ; organization	17
art ; broadcast_program ; music	17
written_work ; music ; play	17
metropolitan_transit ; transit	17
law ; organization	17
biology ; person	17
None ; education ; person	17
education ; organization ; building	17
written_work ; None ; computer ; software	18
award ; building	18
building ; transportation ; location	18
organization ; train	18
organization ; person ; None	18
person ; product ; game	18
event ; software ; None	18
art ; park ; building ; location	18
education ; None ; art ; visual_art	18
transportation ; geography	18
visual_art ; None	18
game ; written_work ; art ; play	18
medicine ; event	18
livingthing ; location	18
broadcast_program ; award ; event	18
software ; organization ; internet	18
play ; written_work ; music	19
location ; event ; geography	19
person ; event ; building	19
law ; None ; computer	19
building ; religion ; organization	19
government_agency ; news_agency ; broadcast	19
event ; language ; art	19
internet ; product ; software	19
organization ; written_work ; internet	19
art ; written_work ; language	20
government_agency ; education ; event ; None	20
None ; people	20
education ; None ; government_agency	20
None ; person ; organization	20
person ; organization ; finance	20
military ; education	20
organization ; government ; people	20
broadcast_program ; None	20
art ; livingthing	20
body_part ; biology ; disease ; product ; chemistry	20
computer ; None ; software	20
biology ; product	20
event ; art ; game	20
event ; None ; art ; visual_art	21
written_work ; finance	21
education ; astral_body	21
location ; title	21
food ; building	21
education ; written_work ; None	21
government_agency ; product ; education ; None	21
None ; event ; government_agency	21
None ; transportation	21
event ; person ; location	21
food ; biology ; chemistry	21
building ; location ; geography	21
person ; game ; art	21
education ; art	22
medicine ; religion	22
written_work ; language ; None	22
play ; person ; art	22
art ; god	22
None ; government ; broadcast_program	22
play ; event ; person	22
music ; written_work ; play	22
person ; people ; location	22
location ; transportation ; building	22
people ; person ; location	22
person ; biology	22
geography ; biology ; location	22
education ; None ; person	22
event ; software	22
organization ; government_agency ; person	22
person ; None ; education	22
government_agency ; education ; None	22
geography ; art	22
location ; government_agency ; park	22
event ; building ; art	22
transit ; rail ; metropolitan_transit ; building	22
people ; language	22
written_work ; park ; geography ; building	22
person ; title ; broadcast_program	22
person ; event ; None	22
person ; written_work ; organization	22
event ; geography	22
title ; None ; education	22
organization ; game	22
None ; game	22
computer ; software ; organization	22
government_agency ; title	22
biology ; food ; chemistry	22
food ; product ; biology	22
person ; organization ; government_agency ; title	22
computer ; written_work ; None	22
game ; language	22
None ; time	22
product ; None ; person	22
location ; military ; building	22
education ; play	22
event ; art ; broadcast_program	22
food ; location	22
organization ; government_agency ; person ; title	22
title ; people ; person	22
location ; park ; building	22
None ; organization ; religion ; people	22
newspaper ; organization ; news_agency ; internet ; person	22
government ; people ; person	22
art ; law	22
event ; None ; religion	22
person ; organization ; news_agency	22
location ; geography ; None	22
art ; None ; language	22
military ; transportation ; building	22
building ; geography ; education	22
music ; event	22
None ; government ; event	22
software ; product ; organization	22
organization ; news_agency ; internet	22
written_work ; None ; product ; organization ; software ; internet	22
product ; finance	23
organization ; None ; government_agency	23
product ; computer ; chemistry	23
location ; people ; person	23
body_part ; chemistry	23
event ; language ; building ; written_work	23
computer ; internet	23
food ; person	23
person ; geography	23
event ; software ; written_work	23
location ; livingthing	23
biology ; product ; medicine ; chemistry	23
government ; award	23
written_work ; broadcast_program ; art	23
organization ; internet ; None	23
education ; language ; art	24
government ; military	24
park ; organization	24
finance ; government_agency	24
product ; train	24
written_work ; event ; None	24
software ; internet ; news_agency	24
government_agency ; military	24
government_agency ; news_agency	24
rail ; building ; park	24
software ; finance	24
art ; written_work ; play	24
broadcast_program ; written_work ; art	24
broadcast_program ; product	24
internet ; organization ; broadcast_program ; broadcast	24
music ; product	24
building ; geography	24
product ; education ; event ; None	25
product ; medicine	25
newspaper ; organization ; news_agency	25
location ; written_work	25
location ; organization ; religion ; military	25
rail ; transportation ; location	25
government_agency ; software	25
play ; written_work	25
military ; organization	25
art ; internet	25
music ; art ; None	25
geography ; location ; building	25
location ; god	26
software ; computer ; product	26
event ; organization ; building	26
location ; military	26
event ; disease	26
education ; software ; None	26
product ; biology ; chemistry ; medicine	26
livingthing ; god	26
product ; rail	26
education ; government_agency	27
None ; organization ; title	27
broadcast ; music	27
title ; award	27
broadcast_network ; organization	27
written_work ; title	27
award ; None	27
transportation ; location ; rail	27
title ; event	28
geography ; location ; biology	28
person ; government ; location	28
building ; rail ; transit	28
organization ; internet ; person	28
geography ; product	28
disease ; None	28
None ; broadcast_program	28
None ; written_work ; art	28
organization ; building ; event	28
game ; product	28
product ; chemistry ; food	28
music ; written_work ; news_agency	29
written_work ; location	29
person ; written_work ; event	29
news_agency ; internet ; written_work	29
written_work ; art ; finance	29
organization ; park ; building	29
game ; music	29
art ; written_work ; None	29
biology ; medicine ; chemistry	29
written_work ; game ; broadcast_program	29
written_work ; computer	30
event ; product ; music	30
None ; building ; finance	30
person ; government_agency ; title	30
award ; person	30
broadcast_program ; art ; written_work	30
person ; organization ; broadcast_network	30
education ; computer ; language	31
person ; play	31
people ; location	31
software ; product ; None	31
park ; transportation	31
building ; government_agency	31
art ; written_work ; broadcast_program	31
news_agency ; None	31
written_work ; None ; time	32
law ; written_work ; government	32
medicine ; person	32
law ; product	32
park ; location ; geography	32
location ; geography ; biology	32
building ; transit	32
software ; building	32
transportation ; None	32
organization ; finance ; event	32
written_work ; None ; event	32
game ; software	32
government ; education	33
people ; government	33
product ; language ; written_work	33
written_work ; None ; finance ; art ; product	33
event ; government ; organization	33
product ; news_agency	33
event ; geography ; location ; transportation	33
None ; government_agency	33
None ; food	33
game ; title	33
transportation ; location ; building	33
livingthing ; broadcast_program	33
product ; chemistry ; biology	33
internet ; music	33
body_part ; time	34
transit ; metropolitan_transit	34
location ; None ; government	34
organization ; broadcast_network	34
product ; medicine ; chemistry	34
biology ; disease	34
event ; language	34
None ; award	34
train ; product	34
finance ; written_work	34
None ; product ; finance	35
livingthing ; None	35
product ; event ; government_agency ; transportation	35
computer ; geography	35
people ; geography ; person	35
location ; geography ; people	35
park ; building ; location	35
broadcast_program ; broadcast_network ; broadcast	35
art ; religion	36
software ; internet ; written_work	36
biology ; location	36
people ; biology	36
education ; None ; building ; computer	36
internet ; broadcast ; None	36
metropolitan_transit ; rail ; train	36
product ; None ; software	37
livingthing ; product	37
person ; organization ; broadcast_network ; broadcast	37
biology ; education	37
finance ; product	37
time ; education	38
location ; person ; people	38
person ; organization ; broadcast	38
product ; internet ; software	38
title ; None	38
organization ; park	38
geography ; person	38
written_work ; government	39
education ; chemistry	39
law ; government	39
government ; people ; person ; location	39
computer ; event	39
event ; person ; building ; None	40
person ; organization ; location	40
medicine ; biology	40
visual_art ; chemistry	40
location ; building ; geography	41
building ; organization ; person	41
chemistry ; food ; biology	41
broadcast_program ; game ; written_work	41
event ; chemistry	41
rail ; location	41
product ; education	42
person ; internet	42
park ; geography ; location	42
organization ; award	42
broadcast_program ; organization	42
person ; government_agency	43
broadcast_program ; music	43
language ; education	43
government_agency ; art	43
law ; computer	43
event ; rail ; building	43
written_work ; None ; software	44
government_agency ; art ; product ; written_work	44
chemistry ; product ; medicine	44
product ; location	44
game ; person	44
written_work ; internet	44
people ; title	44
rail ; train	44
computer ; None ; news_agency	44
product ; software ; None	45
education ; geography	45
geography ; None	45
livingthing ; music	45
biology ; chemistry ; product	45
broadcast ; None	45
internet ; product	45
news_agency ; written_work	45
biology ; disease ; product	45
art ; education	46
product ; astral_body	46
product ; software ; computer	46
art ; visual_art	46
title ; person ; education	46
product ; food ; biology	46
military ; None	46
product ; food ; location ; chemistry	47
None ; god	47
building ; rail ; location	47
education ; building	47
location ; product	47
internet ; None	47
language ; written_work	48
event ; title	48
art ; location	48
location ; biology	48
government_agency ; product ; None	48
broadcast_program ; written_work ; game	48
organization ; person ; internet	49
written_work ; religion ; art	49
music ; broadcast_program	49
finance ; organization	49
astral_body ; None	50
None ; education ; event ; government	50
product ; metropolitan_transit ; None	50
location ; art	51
None ; astral_body	51
god ; livingthing	52
event ; None ; government	52
newspaper ; organization ; news_agency ; internet	52
train ; music	52
government ; government_agency	53
location ; people	53
geography ; astral_body	53
internet ; broadcast	54
astral_body ; location	54
organization ; religion ; military	54
organization ; software	54
software ; written_work	54
government_agency ; education ; person ; title	54
art ; visual_art ; play ; music	55
biology ; None	55
location ; education	55
None ; government_agency ; education	55
religion ; people	55
newspaper ; internet	55
broadcast_program ; location	56
government_agency ; organization ; event	56
food ; organization	56
None ; location ; broadcast	57
None ; chemistry	57
medicine ; product	57
organization ; art	57
broadcast_program ; award	57
music ; None	58
event ; religion	59
building ; geography ; location	59
organization ; news_agency	59
art ; written_work ; person	60
None ; education ; event	60
award ; education	60
location ; astral_body	60
rail ; building ; metropolitan_transit	60
None ; religion	61
product ; livingthing	61
None ; finance	62
art ; play	62
food ; medicine ; chemistry	62
organization ; geography ; building	62
title ; education ; law	62
None ; title	62
building ; art	62
art ; language	63
news_agency ; art	63
metropolitan_transit ; rail ; building	63
finance ; event	64
military ; location ; building	65
geography ; building	65
event ; music	66
event ; broadcast_program	66
law ; education	67
organization ; broadcast	67
government_agency ; education	68
building ; government_agency ; None ; transportation	68
title ; education ; person	68
building ; None ; product	68
rail ; building ; transit	68
news_agency ; internet ; newspaper	68
government_agency ; organization ; military	69
software ; news_agency	69
building ; person	70
newspaper ; news_agency ; internet	70
product ; art	71
livingthing ; art	71
education ; biology	72
game ; written_work	72
award ; military	72
metropolitan_transit ; rail ; transit	73
chemistry ; medicine ; biology	75
organization ; metropolitan_transit	76
biology ; geography ; location	77
medicine ; None	77
play ; art	78
event ; finance	78
language ; person	78
written_work ; law	78
event ; person	78
internet ; written_work	78
event ; military	78
play ; person	79
organization ; law	79
person ; organization ; internet	79
law ; title	80
person ; building	80
internet ; news_agency	80
medicine ; education	81
broadcast_program ; play	81
transit ; rail	81
education ; event ; organization	81
written_work ; news_agency	81
park ; location ; building	81
rail ; person	81
education ; person ; title	82
person ; organization ; product	82
education ; law	83
organization ; religion	83
building ; None ; internet	83
product ; geography	84
event ; location	84
rail ; transit	85
written_work ; organization	86
event ; building ; None	87
written_work ; product	88
astral_body ; event	88
government ; person	89
organization ; rail	89
written_work ; play	90
game ; None	91
written_work ; art ; play	91
rail ; metropolitan_transit	92
education ; event ; None	93
time ; None	93
law ; event	93
product ; person	93
building ; event	93
product ; event	93
organization ; government_agency ; finance	94
person ; language	95
chemistry ; food	96
train ; rail	96
None ; disease	96
building ; transit ; rail	96
transportation ; rail	97
art ; music	99
written_work ; software	99
software ; game	99
event ; government_agency	99
product ; chemistry ; medicine	102
music ; written_work	103
medicine ; biology ; chemistry	103
play ; broadcast_program	104
event ; education ; government_agency	105
None ; medicine	106
event ; written_work	106
art ; product	106
food ; None	107
game ; broadcast_program	107
biology ; medicine	109
organization ; broadcast ; broadcast_network	109
music ; play	109
computer ; None	111
disease ; event	113
chemistry ; None	114
transportation ; building	118
newspaper ; written_work	118
None ; broadcast	118
body_part ; None	118
broadcast_program ; event	119
education ; title	120
written_work ; music	120
None ; internet	121
product ; software	123
education ; event	125
product ; written_work	125
music ; person	126
military ; location	126
finance ; None	127
government_agency ; government	127
None ; organization	128
art ; building	128
computer ; organization	128
product ; internet	129
event ; law	130
written_work ; language	130
event ; product	130
software ; person	131
law ; written_work	131
location ; event	135
education ; title ; person	136
None ; visual_art	137
biology ; chemistry ; medicine	137
written_work ; game	138
product ; food	139
person ; game	140
product ; game	141
organization ; education	141
language ; art	144
chemistry ; education	145
event ; art	146
food ; location ; chemistry	149
law ; None	151
internet ; organization	152
livingthing ; computer	152
person ; event	153
written_work ; person	154
government_agency ; event	154
event ; time	154
broadcast_program ; person	155
food ; chemistry	158
written_work ; broadcast_program ; game	158
education ; language	159
organization ; person ; finance	160
food ; biology	161
language ; None	164
geography ; park	166
software ; organization	168
person ; broadcast_program	169
building ; military	170
chemistry ; biology ; medicine	171
building ; park ; location	173
metropolitan_transit ; building	173
None ; art	175
military ; award	175
biology ; livingthing	175
None ; livingthing	177
government_agency ; location	180
education ; written_work	181
written_work ; education	181
music ; art	181
None ; music	184
None ; location	184
person ; military	185
location ; park	188
art ; None	189
government ; event	189
government_agency ; building	189
organization ; written_work	189
organization ; None	190
person ; livingthing	190
building ; transportation	191
None ; law	192
event ; game	193
education ; medicine	196
product ; building	196
organization ; people	199
livingthing ; person	199
game ; art	202
None ; building	204
title ; education	204
park ; geography	204
person ; music	205
transit ; rail ; building	205
government ; organization	210
art ; game	211
event ; organization	217
person ; title ; education	218
art ; event	222
medicine ; person ; education	228
government ; None	228
game ; event	229
organization ; product	231
livingthing ; food	234
event ; government	235
product ; computer	235
None ; language	236
medicine ; disease	236
product ; organization	238
rail ; organization	239
broadcast_program ; game	241
award ; event	243
None ; biology	248
person ; education ; title	250
location ; government	252
god ; person	260
organization ; military	267
food ; product	269
organization ; government	275
event ; award	276
event ; building	280
person ; None	284
transit ; building ; rail	294
computer ; product	297
government_agency ; organization	301
art ; person	310
location ; None	311
None ; education	317
play ; music	324
government_agency ; None	325
written_work ; event	326
building ; product	339
None ; product	341
medicine ; chemistry ; biology	341
organization ; internet	346
organization ; event	349
finance ; law	351
location ; organization	356
None ; computer	357
None ; geography	360
education ; organization	362
software ; product	373
internet ; software	382
building ; None	392
art ; broadcast_program	400
park ; location	406
organization ; broadcast_network ; broadcast	409
person ; product	410
astral_body ; product	422
people ; person	424
newspaper ; news_agency	424
person ; art	431
government_agency ; finance	436
time ; event	447
organization ; location	454
location ; government_agency	454
None ; written_work	461
product ; None	461
organization ; finance ; person	464
None ; person	470
chemistry ; medicine	529
software ; computer	537
religion ; organization	545
written_work ; None	553
software ; None	553
person ; people	591
None ; event	597
product ; chemistry	609
broadcast_program ; art	642
organization ; government_agency	650
event ; None	660
building ; rail ; metropolitan_transit	666
art ; written_work	681
biology ; chemistry	681
written_work ; broadcast_program	686
transit ; building	693
food ; livingthing	704
None ; software	708
person ; god	714
livingthing ; biology	715
building ; organization	716
education ; None	724
organization ; finance	739
software ; internet	747
broadcast ; broadcast_network	753
chemistry ; product	781
None ; government	785
computer ; software	818
building ; location	819
written_work ; art	825
location ; person	842
chemistry ; biology	847
rail ; metropolitan_transit ; building	850
person ; location	867
building ; park	934
metropolitan_transit ; rail	965
park ; building	1019
government ; location	1024
organization ; building	1226
person ; written_work	1467
title ; person	1481
written_work ; religion	1481
broadcast_network ; broadcast	1513
person ; education	1606
education ; person	1650
location ; building	1959
broadcast_program ; written_work	2612
medicine ; chemistry	3104
rail ; building	3272
transportation ; location	3291
geography ; location	3840
organization ; person	4529
location ; transportation	5170
location ; geography	7031
person ; title	8075
person ; organization	13805
building ; rail	19797
