# Supplementary material
Source: ML conference proceedings conference paper supplement (https://aclanthology.org/2022.findings-acl.96)
Supplement: software [file wiki_FIGER_layer1_labelset_nums_by_utypes.xlsx]

## Sheet: wiki_FIGER_layer1_labelset_nums
event ; play	1
astral_body ; geography	1
chemistry ; food ; location	1
military ; person	1
medicine ; person	1
biology ; chemistry	1
event ; time	1
education ; geography	1
computer ; event	1
award ; military	1
location ; rail	1
event ; written_work	1
education ; medicine	1
internet ; music	1
astral_body ; event	1
art ; visual_art	1
military ; organization ; religion	1
art ; product	1
organization ; written_work	1
event ; military	1
art ; play ; written_work	1
location ; transportation	1
disease ; event	1
computer ; software	1
chemistry ; education	1
chemistry ; medicine	1
computer ; livingthing	1
religion ; written_work	1
metropolitan_transit ; transit	1
event ; game	1
building ; government_agency	1
location ; organization	1
biology ; disease ; product	1
person ; written_work	1
biology ; geography	1
biology ; medicine	1
finance ; product	1
computer ; product	1
building ; transportation	1
building ; park	1
finance ; government_agency	1
broadcast ; broadcast_network	1
building ; rail ; transit	1
astral_body ; product	1
internet ; newspaper	1
organization ; person	1
biology ; education	2
biology ; location	2
food ; livingthing	2
building ; metropolitan_transit ; rail	2
building ; military	2
organization ; rail	2
location ; military	2
organization ; religion	2
internet ; software	2
person ; title	2
biology ; livingthing	2
art ; broadcast_program	2
internet ; news_agency	2
rail ; transit	3
building ; location	3
chemistry ; product	4
building ; transit	4
military ; organization	4
metropolitan_transit ; rail	4
finance ; organization	7
building ; organization	8
building ; rail	11
geography ; location	21
