# Supplementary material
Source: ML conference proceedings conference paper supplement (https://aclanthology.org/2022.findings-acl.96)
Supplement: software [file wiki_FIGER_layer1_nums_by_mention.xlsx]

## Sheet: wiki_FIGER_layer1_nums_by_menti
person	690749
location	224834
organization	166490
building	96349
livingthing	81417
event	75083
product	64599
geography	61882
None	59517
art	45722
written_work	44857
rail	41292
broadcast_program	37508
chemistry	30921
transportation	26877
music	23697
game	21357
biology	21082
title	20875
education	20305
government	19931
government_agency	19476
software	18977
language	16192
astral_body	15363
people	13483
food	11072
military	11039
disease	10192
law	9989
medicine	9768
award	9661
computer	9635
time	9316
metropolitan_transit	8984
park	8579
broadcast	7731
internet	7692
finance	7683
god	6543
religion	5179
broadcast_network	3898
play	3386
transit	3003
news_agency	2808
train	2481
newspaper	2432
body_part	1861
visual_art	966
