# Supplementary material
Source: ML conference proceedings conference paper supplement (https://aclanthology.org/2022.findings-acl.96)
Supplement: software [file wiki_FIGER_layer1_nums_by_utypes.xlsx]

## Sheet: wiki_FIGER_layer1_nums_by_utype
person	1118
product	818
None	510
location	383
event	379
organization	344
building	339
written_work	230
software	182
food	156
chemistry	135
astral_body	119
geography	118
game	118
education	105
art	104
biology	97
computer	96
government_agency	85
music	83
livingthing	76
finance	74
language	68
internet	62
medicine	61
law	52
military	46
government	45
rail	44
broadcast_program	34
transportation	33
title	30
people	29
time	27
religion	26
play	21
award	21
broadcast	21
park	21
train	20
disease	18
transit	16
metropolitan_transit	16
body_part	15
news_agency	11
god	9
newspaper	6
visual_art	5
broadcast_network	5
